# 1 Deep learning neural network prediction method improves proteome profiling of vascular 2 sap of grapevines during Pierce's disease development

3 Cíntia H. D. Sagawa<sup>1</sup>, Paulo A. Zaini<sup>1</sup>, Renata de A. B. Assis<sup>1,2</sup>, Houston Saxe<sup>1</sup>, Michelle Salemi<sup>3</sup>, Aaron  
4 Jacobson<sup>1</sup>, Brett S. Phinney<sup>3</sup>, Abhaya M. Dandekar<sup>1\*</sup>

5 <sup>1</sup> Department of Plant Sciences, University of California, Davis, CA 95616, USA;

6 <sup>2</sup> Departamento de Ciências Biológicas, Instituto de Ciências Exatas e Biológicas, Núcleo de Pesquisas em Ciências  
7 Biológicas, Universidade Federal de Ouro Preto, Ouro Preto, MG, 35400-000, Brazil;

8 <sup>3</sup> Proteomics Core Facility, University of California, Davis, CA 95616, USA;

9 \*Author to whom correspondence should be addressed: amdandekar@ucdavis.edu

10

## 11 Abstract

12 Plant secretome studies have shown the importance of plant defense proteins in the vascular  
13 system against pathogens. Studies on Pierce's disease of grapevines caused by the xylem-limited  
14 bacteria *Xylella fastidiosa* (*Xf*) have detected proteins and pathways associated to its  
15 pathobiology. Despite the biological importance of the secreted proteins in the extracellular  
16 space to plant survival and development, proteome studies are scarce due to technical and  
17 technological challenges. Deep learning neural network prediction methods can provide  
18 powerful tools for improving proteome profiling by data-independent acquisition (DIA). We  
19 aimed to explore the potential of this strategy by combining it with *in silico* spectral library  
20 prediction tool, ProSIT, to analyze the proteome of vascular leaf sap of grapevines with Pierce's  
21 disease. The results demonstrate that the combination of DIA and ProSIT increased the total  
22 number of identified proteins from 145 to 360 for grapevines and 18 to 90 for *Xf*. The new  
23 proteins increased the range of molecular weight, assisted on the identification of more exclusive  
24 peptides per protein, and increased the identification of low abundance proteins. These increases  
25 allowed the identification of new functional pathways associated with cellular responses to  
26 oxidative stress to be further investigated.

27 **Keywords:** predicted spectral library; quantitative proteomics; ProSIT; apoplast; xylem sap;  
28 grapevine; Pierce's Disease

29

## 30 1. Introduction

31 The vascular system is essential for the exchange of information and resource allocation  
32 throughout the plant, from roots to aerial tissues. It is composed of two types of vascular tissues:

33 phloem and xylem. The phloem sap contains photoassimilates and other macromolecules that  
34 move throughout the plant from areas of synthesis or excess (source) to areas of use (sink) and  
35 storage [1]. The xylem sap transports water and nutrients from roots to aerial tissues, driven by a  
36 difference in water potential due to transpiration (Tanner and Beevers, 2001). Recent studies  
37 have shown that the xylem can also contain a wide range of proteins involved in various  
38 biological processes involved in growth regulation, protection against environmental stress,  
39 homeostasis, gas exchanges, cell to cell adhesions, and plant defense against pathogens [3].  
40 These processes are dependent on vesicular trafficking of proteins to the extracellular space,  
41 which can either follow conventional or unconventional secretion routes in plant cells. The  
42 conventional secretion in plants requires signal peptides in the N-terminus or proper recognition  
43 signals to direct them to the endomembrane system pathway, while proteins that follow the  
44 unconventional secretion route lack these signals [4]. Plant secretome studies have shown that  
45 proteins that follow unconventional secretion can allow plants to respond to a wider range of  
46 extracellular stresses and stimuli, facilitating defense responses under stress [4], [5]. Despite the  
47 biological importance of the secreted proteins in the extracellular space to plant survival and  
48 development, proteome studies are scarce due to technical and technological challenges.

49         Studies on the role of vascular sap have helped to better understand plant responses to  
50 vascular plant diseases (Yadeta and Thomma, 2013). The Gram-negative gammaproteobacteria  
51 *Xylella fastidiosa* (*Xf*) is a xylem-limited pathogen that colonizes several economically important  
52 crops worldwide causing deadly diseases such as Pierce's disease in grapevines (PD) (Davis et  
53 al., 1978), Citrus Variegated Chlorosis (CVC) [8] and most recently Olive Quick Decline  
54 Syndrome (OQDS) in Europe (Martelli, 2016). Due to the significant economic impact on the  
55 production of citrus in Brazil, *X. fastidiosa* was the first plant pathogen to have its genome  
56 sequence determined [10]. The genomic landscape provided an initial description of potential  
57 virulence factors and revealed the absence of a type III secretion system commonly employed by  
58 plant pathogens to deliver virulence effectors inside plant cells. Molecular and cellular studies  
59 followed proposing that the mechanism of disease symptoms would be associated with biofilm  
60 formation and xylem blockage triggering the observed disease symptoms [11]–[15].  
61 Additionally, genomics and proteomics have shown the importance of virulence factors secreted  
62 by the type II secretion system and outer membrane vesicles for symptom development  
63 (Nascimento et al. 2016; Gouran et al. 2016; Santiago et al. 2016; Cianciotto and White 2017;

64 Feitosa-Junior et al. 2019). These studies highlighted the molecular complexity of the plant-  
65 pathogen interaction that takes place in the vascular system.

66 The first study on xylem sap proteomics in grapevines was performed in sap bleedings  
67 from the cultivar Chardonnay (Agüero et al. 2008), which revealed only ten proteins from two-  
68 dimensional (2D) gel electrophoresis analysis. As new technologies and proteomic approaches  
69 became more sensitive, more proteins were found in the vascular sap of grapevines, increasing  
70 the number of identified proteins to 200 varying from 20 to 75 kDa showing differences among  
71 resistant and susceptible cultivars to PD (Delaunois et al. 2013). The importance of proteins in  
72 the plant response to *X. fastidiosa* was initially shown by Yang et al. (2011) in a proteomic study  
73 of stems from infected grapevines. This study revealed thaumatin-like, pathogenesis-related  
74 protein 10 and three heat shock proteins were significantly overexpressed in PD-resistant  
75 varieties of grapes (Yang et al. 2011). Another study also conducted on the stem of infected  
76 grapevines of PD-tolerant and susceptible cultivars identified more than 200 proteins associated  
77 with disease resistance, energy metabolism, protein processing and degradation, biosynthesis,  
78 stress-related functions, cell wall biogenesis, signal transduction, and ROS detoxification among  
79 others [23]. The most recent published study conducted on sap bleeding of infected grapevines  
80 highlighted 91 proteins. The novelty of this study was the incorporation of structural data into the  
81 proteomic data analysis to enhance the identification of functionally relevant protein candidates  
82 that would not be detected from simple amino acid sequence alignments. This study highlighted  
83 pathogenesis-related proteins, chitinases, and  $\beta$ -1, 3-glucanases as crucial players in the defense  
84 against *X. fastidiosa* [25]. These studies greatly enhanced our understanding of xylem sap  
85 physiology; however, they were restricted to more abundant proteins which we have learned to  
86 be only a small fraction of xylem sap complexity.

87 The standard approach in proteomic studies was 2D gel electrophoresis for many years  
88 due to its robustness and compatibility with bottom-up (shotgun) proteomics in which the crude  
89 protein extract is digested directly for analysis. However, the limitations regarding  
90 reproducibility and narrow dynamic range of high abundance proteins masked low abundant  
91 counterpart, limiting those analyses [26]. Electrophoresis gels can now be replaced by liquid  
92 chromatography coupled with tandem mass spectrometry (LC-MS/MS), which has become the  
93 most used method to measure the different states and abundance of proteins, lipids and other  
94 metabolites [27].

95           One of the acquisition schemes of tandem mass spectrometry is called data-independent  
96 acquisition (DIA) which is based on the acquisition of fragment-ion information for all precursor  
97 ions until the desired mass range has been covered, as demonstrated by the sequential window  
98 acquisition of all the theoretical mass spectra (SWATH) approach [28]. DIA has been used to  
99 identify and quantify thousands of proteins without performing fractionation, increasing  
100 reproducibility, and requiring a small amount of protein [27], [29], [30]. Although it improves  
101 protein detection with higher reproducibility, the lack of accurate predictive models for fragment  
102 ion intensities has impaired its full potential. DIA analysis often uses peptide physiochemical  
103 properties stored in spectral libraries or chromatogram libraries. These properties can include  
104 information on peptide retention time, product ion m/z, product ion intensity and ion mobility  
105 among others [31], [32]. Using this information can ensure confident peptide identification and  
106 quantification. Two methods exist to obtain this information, one is experimental and the other is  
107 predictive. An example of a predictive method is the deep learning architecture termed Prosit  
108 which was created to take advantage of a large number of synthetic peptides and tandem mass  
109 spectra generated within the ProteomeTools project to predict with high quality both  
110 chromatographic retention time and fragment ion intensity of any peptide [33]. Here we  
111 demonstrate the improved performance of integrating Prosit into the DIA pipeline. By  
112 reanalyzing our DIA data of the vascular leaf sap of grapevines infected by *X. fastidiosa*  
113 compared with healthy plants, we increased the number of identified proteins depicting a deeper  
114 description of this plant pathogen interface and generated spectral libraries for DIA analysis of  
115 *Vitis vinifera* and *Xylella fastidiosa* that can be incorporated in future proteome studies.

116

## 117 **2. Material and methods**

118

### 119 **2.1. Plant material and *X. fastidiosa* inoculation**

120           Clonal grapevine plants (*Vitis vinifera* L. cv. 'Thompson Seedless') were generated from  
121 cuttings using green canes from the current season's growth. Each cutting was approximately 6  
122 inches long and contained two nodes, with a petiole originating from the top node that supported  
123 approximately one square inch of leaf area to maintain minimal photosynthesis during rooting.  
124 These prepared cuttings were placed into an EZ-Clone aeroponic cloning system that circulates  
125 water purified by reverse osmosis. Roots begin to self-generate after two weeks, and the rooted

126 cuttings were potted after three-weeks and grown in a greenhouse. New plant growths was  
127 trained to a single cane by removing any lateral shoots that emerged. The single cane plants  
128 were topped at the height of 1 meter, and additional lateral shoots were removed as they emerged  
129 during the experiment. After ten-weeks, the grapevines were infected at 8–12 cm above soil level  
130 by punching with a needle gauge to inoculate 20  $\mu$ L of cultured cells of *Xylella fastidiosa*  
131 Temecula1 (*Xf*; ATCC 700964) into the stem as described by Nascimento et al. (2016). The  
132 bacterial culture was grown on PD3 medium at  $2 \times 10^8$  cells/mL incubated with aeration (120  
133 rpm) at 28°C. After inoculation, plants were placed in the greenhouse in a randomized block  
134 design and monitored for 12 weeks post inoculation until leaf symptoms developed.

135

### 136 **2.3. Vascular sap extraction and *X. fastidiosa* quantification**

137 Vascular leaf sap was collected from ten leaves above the inoculation point using a  
138 pressure chamber (Soil Moisture Equipment Corp., Santa Barbra, CA, USA). Pressure was  
139 applied to each leaf blade and the sap collected from the end of the petiole. The leaf blade was  
140 placed inside the pressurized chamber leaving only the cut surface of the petiole exposed to  
141 release the vascular content, which was collected using a micropipette and stored in a tube on ice  
142 during harvest. Pools of about ten leaves above the inoculation point from one plant made one  
143 sample (500  $\mu$ L - 1000  $\mu$ L). Before processing with the sample preparation for proteomics  
144 analysis, an aliquot of 25  $\mu$ L was reserved from each sample for extraction of DNA with  
145 MasterPure™ kit (Epicentre) and bacterial cell count was measured using qPCR (TaqMan™).  
146 The primers used were HL5 and HL6 described by Francis et al. (2006). A standard curve was  
147 used based on a known serial dilution of *Xf* cells measured by OD<sub>600</sub>.

148

### 149 **2.4. Protein digestion of vascular leaf sap**

150 Up to one milliliter of vascular leaf sap was collected from each plant (pooled from 10  
151 leaves) and a total of three plants per group (Healthy and Diseased) were used. Samples were  
152 centrifuged at 5,000 rcf for 5 min at 4°C. The supernatant containing the vascular leaf sap was  
153 transferred to a new tube. Total protein content was quantified by Qubit™ Protein Assay Kit  
154 (Thermo Fisher Scientific). Sap containing 100  $\mu$ g of protein was freeze-dried and resuspended  
155 in 5% SDS and 50mM triethylammonium bicarbonate (TEAB) at pH 7.55 to a concentration of  
156 0.5  $\mu$ g/ $\mu$ L. Digestions with trypsin followed the S-Trap™ Micro Spin Column Digestion

157 Protocol with few modifications. Initially, 10 mM dithiothreitol (DTT) was added and incubated  
158 at 50°C for 10 min and rested at room temperature for 10 min. Next, 5 mM iodoacetamide (IAA)  
159 was added and incubated at room temperature for 30 min in the dark. The samples were acidified  
160 with 12% phosphoric acid followed by the addition of 2.348 mL of freshly made S-trap buffer  
161 (90% methanol, 100 mM TEAB, pH 7.1) and mixed immediately by inversion. The entire  
162 acidified lysate/St-buffer mix was transferred to the S-trap spin column (650 uL at a time) and  
163 centrifuged at 3,000 rcf for 1 min or until all the solution passed through the column. Columns  
164 were washed with 400 uL of S-trap buffer and centrifuged at 4,000 rcf until dry. Columns were  
165 transferred to a clean elution tube. Trypsin enzyme digest buffer was carefully added (1:25  
166 enzyme: total protein in 121 uL 50mM TEAB, pH 8.0) to the column and followed by incubation  
167 at 37°C overnight. After the first hour, the trypsin digestion step was repeated. Peptide elution  
168 steps included 80 uL of 50 mM TEAB (pH 8.0) followed by centrifugation at 1,000 rcf for 1  
169 min, 80 uL of 0.5% formic acid followed by centrifugation at 1,000 rcf for 1 min, 80 uL of the  
170 solution containing 50% acetonitrile and 0.5% formic acid followed by centrifugation at 4,000  
171 rcf for 1 min. The final pooled elution was dried down in a speed-vacuum. Peptides were  
172 resuspended in 0.1% TFA 2% ACN and quantified using Pierce™ Quantitative Fluorometric  
173 Peptide Assay (Thermo Fisher Scientific). Equal portions of all samples were mixed together to  
174 make a reference sample to be run multiple times for chromatogram library runs.

175

## 176 **2.5. Liquid chromatography tandem mass spectrometry**

177 The next steps were processed at the UC Davis Proteomics Core Facility. Peptides were  
178 trapped on a Thermo PepMap trap and separated on an Easy-spray 100 um x 25 cm C18 column  
179 using a Dionex Ultimate 3000 nUPLC at 200 nl/min. Solvent A= 0.1% formic acid, Solvent B =  
180 100% Acetonitrile 0.1% formic acid. Gradient conditions = 2%B to 50%B over 60 minutes,  
181 followed by a 50%-99% B in 6 minutes and then held for 3 minutes than 99%B to 2%B in 2  
182 minutes and total run time of 90 minutes using Thermo Scientific Fusion Lumos mass  
183 spectrometer running in Data Independent Acquisition (DIA) mode.

184

## 185 **2.6. Chromatogram library creation**

186 Six-gas phase fractionated (GFP) chromatogram library injections were made using  
187 staggered 4 Da isolation widows. GFP1 = 400-500 m/z, GFP2 = 500-600 m/z, GFP3 = 600-700



188 m/z, GFP4 = 700-800 m/z, GFP5 = 800-900 m/z, GFP6 = 900-1000 m/z, mass spectra were  
189 acquired using a collision energy of 35, resolution of 30 K, maximum inject time of 54 ms and a  
190 AGC target of 50K. Each individual sample was run in DIA mode with staggered isolation  
191 windows of 12 Da in the range 400-1000 m/z.

## 192 **2.7. Analytic samples, data analysis and raw data processing**

193 Each individual sample was run in DIA mode using the same settings as the  
194 chromatogram library runs except using staggered isolation windows of 12 Da in the m/z range  
195 400-1000 m/z. DIA data was analyzed using Scaffold DIA v.2.0.0 (Proteome Software, Portland,  
196 OR, USA). Raw data files were converted to mzML format using ProteoWizard v.3.0.11748  
197 [35].

## 199 **2.8. Spectral library search**

200 The Reference Spectral Library was created by EncyclopeDIA v.0.9.2. Chromatogram  
201 library samples were individually searched against Prosit predicted databases created using  
202 Prosit online server (<https://www.proteomicsdb.org/prosit/> ) and converted for ScaffoldDIA  
203 using the Encyclopedia tools [32]. The input for the Prosit prediction consisted of UniProt  
204 proteome UP000009183 (*Vitis vinifera*, Grape), UniProt proteome UP00000812 (*Xylella*  
205 *fastidiosa*) and 114 common laboratory contaminants (<https://www.thegpm.org/crap/>) with a  
206 peptide mass tolerance of 10.0 ppm and a fragment mass tolerance of 10.0 ppm. Variable  
207 modifications considered were oxidation of methionine and static modifications were  
208 carbamidomethyl of cysteine. The digestion enzyme was assumed to be Trypsin with a  
209 maximum of 1 missed cleavage site(s) allowed. Only peptides with charges in the range [2-3]  
210 and length in the range [6-30] were considered. Peptides identified in each search were filtered  
211 by Percolator (3.01.nightly-13-655e4c7-dirty) [36]–[38] to achieve a maximum FDR of 0.01.  
212 Individual search results were combined, and peptides were again filtered to an FDR threshold of  
213 0.01 for inclusion in the reference library. A summary of the workflow is presented in Figure 1.

## 215 **2.9. Quantification and criteria for protein identification**

216 Peptide quantification was performed by EncyclopeDIA v. 0.9.2. For each peptide, the  
217 five highest quality fragment ions were selected for quantitation. Proteins that contained similar

218 peptides and could not be differentiated based on MS/MS analysis were grouped to satisfy the  
219 principles of parsimony. Proteins with a minimum of 2 identified peptides were thresholder to  
220 achieve a protein FDR threshold of 1.0%.

221

## 222 **2.10. Functional enrichment analysis**

223 The functional analysis of proteomics of vascular leaf sap of grapevines was performed  
224 by the online software Metascape [39] using the express analysis settings. The up and  
225 downregulated *Vitis vinifera* protein IDs of diseased samples were converted into the  
226 corresponding *Arabidopsis* homolog protein IDs and analyzed independently. The *Arabidopsis*  
227 homologs were identified in TAIR using Protein Basic Local Alignment Search Tool (BLASTP).  
228 Metascape identified pathways and process enrichment analysis defined by the Kyoto  
229 Encyclopedia of Genes and Genomes (KEGG). P-value was adjusted by the method of  
230 Benjamin-Hochberg to control the false discovery rate (FDR).

231

## 232 **3. Results**

233

### 234 **3.1. Creating a DIA library and improving the datamining of xylem proteome data.**

235 In this study, we compared the proteome of vascular leaf sap from healthy grapevines to  
236 those developing PD symptoms due to *X. fastidiosa* (*Xf*) infection. Infection was confirmed by  
237 qPCR that quantified a high number of bacterial cells  $1.5 \times 10^9$  cells/mL present in the diseased  
238 samples (Table S1). The vascular system is particularly crucial for this pathosystem as *Xf* cells  
239 are restricted to this microenvironment within plants. Thus, much of its interaction with the host  
240 occurs on the surface of xylem cells. As proteomic methods and equipment are rapidly evolving,  
241 we investigated the effect of a new deep neural proteome prediction method, Prosit, to identify  
242 proteins from mass spec data applied on Data Independent Acquisition (DIA) currently in use.

243 Figure 2a shows the proteomics results from vascular leaf sap of grapevines *Vitis vinifera*  
244 (VIT) at 12 weeks post-inoculation with *Xf*. DIA analysis identified 145 and 18 proteins for VIT  
245 (Table S2) and *Xf* (Table S3), respectively. After integrating Prosit into database search  
246 pipelines, the number of proteins increased by more than 148% for VIT and 400% for *Xf*, to a  
247 final total of 360 and 90 proteins (Tables S4 and S5). Only six VIT proteins were identified  
248 exclusively without Prosit and 221 only by integrating Prosit (DIA+Prosit), with 139 detected in



249 either approach for VIT (Fig.2b, Table S6). Among the six VIT proteins identified by DIA only,  
250 four are peroxidases (VIT\_01s0010g01950, VIT\_01s0010g01960, VIT\_01s0010g02000,  
251 VIT\_01s0010g02010), an uncharacterized protein with serine-type endopeptidase activity  
252 (VIT\_16s0098g01160), and a Glyco\_hydro\_18 domain-containing protein  
253 (VIT\_16s0050g02220). Nevertheless, the proteins detected exclusively by Prosit were associated  
254 with many more molecular functions, including cell adhesion molecules, scaffold/adaptors  
255 proteins, chaperones, translational proteins, transporters, and nucleic acid-binding proteins.  
256 Regarding the *Xf* bacterial proteins, 18 proteins were identified by both methods; however,  
257 DIA+Prosit allowed the detection of an additional 72 proteins that were not present in the DIA  
258 data (Table S7).

259 The application of Prosit to our data substantially increased the number of proteins with a  
260 molecular weight below 100 kDa. The range of molecular weight varied from 12 kDa to 217 kDa  
261 in DIA data and 8 kDa to 217 kDa in DIA+Prosit data. A breakdown of identified proteins on  
262 both methods by molecular weight and the number of mapped peptides is shown in Figure 3a.  
263 The smallest proteins predicted by DIA are AAI domain-containing proteins  
264 (VIT\_02s0236g00020 and VIT\_02s0236g00030) with 12 kDa, both upregulated in diseased  
265 plants. In addition to identifying more proteins, DIA+Prosit also increased the number of  
266 peptides identified for each protein. This is a significant advancement since we set a minimum of  
267 two mapped peptides per protein for it to be considered, considerably increasing the confidence  
268 and reducing false discoveries. The maximum of peptides identified per protein for DIA was 22,  
269 and for DIA+Prosit was 31 peptides. Most of the proteins identified after Prosit integration  
270 showed 2 to 10 peptides per protein (Fig.3b). In DIA+Prosit data, 8 kDa was the smallest protein  
271 detected, identified as BBE domain-containing protein (VIT\_10s0003g05430) with a signal  
272 peptide targeting mitochondria (mTP) according to TargetP (Fig.4). Both AAI domain-  
273 containing proteins detected by DIA were also present with DIA+Prosit, and a third AAI  
274 domain-containing protein (VIT\_16s0013g00070) was also detected. This is yet another  
275 important improvement as protein families with multiple members represented in a dataset gain  
276 higher scores in functional analyses such as gene ontology or pathway mapping.

277 The analyzed material is an enriched vascular leaf sap; thus, we determined the  
278 proportions of proteins predicted to be secreted (Fig.4). The percentage of secreted proteins with  
279 a predicted signal peptide within the total proteins predicted for DIA was 68% (99/145), and for

280 DIA+Prosit was 57% (205/360), according to SignalP. By using TargetP to analyze the same  
281 data sets, we found similar results: 72% and 59% for DIA and DIA+Prosit, respectively. The  
282 remaining were classified as non-secretory targeting the mitochondria (1-2%), chloroplast (3-  
283 4%), or other (23-34%). By performing the same analysis using the prediction tool ChloroP, we  
284 showed that actually, 16% of the proteins in both data sets would target chloroplasts; therefore,  
285 their presence in the xylem sap possibly reflects some degree of cellular content contamination  
286 of the samples during vacuum-assisted sap extraction or alternatively products of natural cellular  
287 and organellar degradation.

288

### 289 **3.2. Regulation of proteins secreted to the xylem during Pierce's disease**

290 We used the MetaboAnalyst v.4.0 (<https://www.metaboanalyst.ca>) to visualize both  
291 proteome data sets and examined the variation between the groups and samples [40]. The  
292 variability was examined by the unsupervised principal component analysis (PCA), which  
293 showed a distinct separation between groups in both data sets, DIA and DIA+Prosit (Fig.5). In  
294 this case, the intense response to *Xf* proliferation is so marking that Prosit was unnecessary to  
295 efficiently cluster the samples by type; however, we cannot exclude the possibility Prosit would  
296 be decisive in more attenuated differences. Healthy and Diseased groups showed 85.6% variation  
297 in PC1 for DIA (Fig.5a) and 68% variation in PC1 for DIA+Prosit (Fig.5b). These results  
298 suggest the effect of *Xf* cells in the plant stress response in the proteome of the vascular leaf sap.  
299 The variation among samples explained by PC2 was 7.8% for DIA. Prosit increased the variation  
300 among samples to 16.3%, explained by PC2. For this clustering analysis, the third sample of the  
301 Healthy grapevines was discarded due to bad MS/MS data quality; therefore, a virtual sample  
302 was created using an average of the other two samples (W5 and W6; W5\_W6). The protein  
303 levels in Healthy and Diseased group samples were distinct, independent of the method (Fig.S1).  
304 To further analyze the differences between methods, we analyzed the ratio-intensity of Healthy  
305 and Diseased groups and compared them to the protein abundance in both proteome data sets.  
306 The fold change of protein detection between Diseased and Healthy plants presented similar  
307 results for DIA and DIA+Prosit data (Fig.6a and 6b). However, the implementation of Prosit  
308 increased the detection of the proteins that were in low abundance, as shown by the x-axis in  
309 Figures 6a and 6b. The correlation of results obtained by both methods was significant and had

310 an  $R^2$  of 0.8795 (Fig.6c), showing that the increase of protein prediction power by Prosit  
311 correlates well with the observed data without introducing bias in differential expression.

312 To visualize proteins that are significantly either up or downregulated in the Diseased  
313 group, we examined volcano plots of both data sets (Fig.7). The comparison of the  $\log_2$  fold  
314 change of the data sets and their adj. P-values by false discovery rates show a similar profile;  
315 however, the integration of Prosit allowed the identification of additional proteins that were  
316 significantly up and downregulated in the Diseased group. We observed that DIA without Prosit  
317 was more restrictive, and the maximum fold changes between Diseased and Healthy plants were  
318 not as high. The three most upregulated proteins identified by DIA+Prosit were chitinase A  
319 (VIT\_16s0050g02230), Cupredoxin superfamily protein (VIT\_18s0001g11180), and beta-1,3-  
320 glucanase 3 (VIT\_08s0007g06060 - PR-2 family of pathogenesis-related proteins). The most  
321 downregulated proteins were Plant invertase/pectin methylesterase inhibitor superfamily  
322 (VIT\_07s0005g00720), Glyco\_hydro\_18 domain-containing protein (VIT\_06s0004g03840), and  
323 FAD-binding berberine family protein (VIT\_10s0003g05470).

324 For a balanced comparison between both methods, we used partial least squares -  
325 discriminant analysis (PLS-DA) of the 139 proteins that were detected by both methods. The  
326 VIP score (a metric that identifies which variables are most responsible for the differences  
327 between the classes in the analysis) was higher in DIA compared to DIA+Prosit. Among the top  
328 25 proteins contributing to the variations among the two sample groups, we can highlight the  
329 pathogenesis-related proteins (PR1, PR2, PR3, PR4) that are upregulated in Diseased plants  
330 independent of the chosen method. Only five proteins among the top 25 in DIA were not in  
331 DIA+Prosit, and seven proteins were in DIA+Prosit and not DIA. The PLS-DA plots and the  
332 cross-validation test result are shown in Fig.S2.

333

### 334 **3.3. Pathway regulation in grapevine vascular leaf sap**

335 Representation of known enzyme pathways or protein complexes in vascular leaf sap  
336 proteome assists in the functional characterization of the plant response to infection and  
337 virulence strategies by the pathogen. The results showed that Prosit provides the identification of  
338 more pathways involved in defense during Pierce's disease symptom development. Proteins that  
339 were up or downregulated in the Diseased group were analyzed separately to detect enriched  
340 pathways in each condition. Figures 9 and 10 show the up and downregulated proteins in both

341 methods considering all the detected proteins for each (145 for DIA and 360 for DIA+Prosit).  
342 Most of the enriched pathways identified using DIA datasets were also present in DIA+Prosit.  
343 However, for DIA+Prosit, due to the higher number of proteins, more pathways significantly  
344 affected were revealed.

345 The proteins identified by DIA that were upregulated in Diseased samples were involved  
346 in aminoglycan catabolic process, response to bacterium, cell wall organization or biogenesis,  
347 innate immune response, gluconeogenesis, hydrogen peroxide catabolic process, and response to  
348 cadmium ion. The most statistically significant pathways (involved in aminoglycan catabolic  
349 process, response to bacterium, cell wall organization or biogenesis, and innate immune  
350 response) were upregulated in both DIA and DIA+Prosit data. The latter revealed a higher  
351 number of proteins thus higher coverage and also showed other pathways such as response to ion  
352 and carbon fixation in photosynthetic organisms as more significantly enriched (lower p-values).

353 The analysis of the downregulated proteins in the Diseased plants showed that except for  
354 the arabinan catabolic process, all the other identified pathways were significantly enriched in  
355 the DIA+Prosit approach, which revealed galactose metabolism, hexose metabolic process,  
356 reductive pentose phosphate cycle and response to cadmium ion.

357

#### 358 **4. Discussion**

359

360 This was the first DIA study of vascular sap of grapevines using Prosit [33]. We used a  
361 pressure chamber to extract the vascular leaf sap from grapevines comparing healthy and  
362 diseased plants and submitted samples for proteome analysis. Previous studies of the grapevine  
363 xylem proteome have provided important clues regarding the plant responses to infection;  
364 however, they have also faced several technical challenges in extracting enough material to  
365 adequately describe the complexity of this pathosystem. The focus of this study was to show the  
366 application of DIA in combination with Prosit to improve protein prediction and quantification in  
367 the vascular sap of leaves infected with *Xylella fastidiosa*. Our results suggest that incorporating  
368 a deep learning architecture approach like Prosit to DIA data could help researchers identify  
369 more protein candidates in response to pathogenesis and other biological phenomena. Prosit  
370 significantly increased the number of proteins, especially in low abundance detected in both from  
371 *Vitis* and *Xylella*, contributing to a more detailed picture of this plant-pathogen interaction.

372

#### 373 **4.1. A new proteomic approach for vascular sap studies**

374 The implementation of Prosit to the DIA data increased detected proteins from 145 to 360 for  
375 grapevines and from 18 to 90 proteins detected for *Xylella fastidiosa*. Proteomics studies from  
376 vascular plant sap have always faced technical challenges due to the low protein concentration  
377 present in this plant organ. Previous studies identified differently expressed transcripts and  
378 proteins in grapevines by 2D-PAGE for protein isolation and further detection by MS/MS. The  
379 maximum resolution for these sample types was around 100 proteins with molecular weights  
380 from 20 kDa-75 kDa, with a majority higher than 40 kDa [41]. The most recent proteomic study  
381 related to Pierce's disease detected 91 proteins by LC-MS/MS that ranged from 12 kDa-114 kDa.  
382 That study demonstrated that structural data could be incorporated in the pipeline of proteomic  
383 data analysis using CHURNER [25]. The number of identified peptides from these 91 proteins  
384 also ranged from 2-23 peptides. Combining DIA+Prosit with these complementary functional  
385 approaches might provide yet a deeper comprehension of the relevant processes taking place  
386 during infection and the molecular functions that could be targeted with priority for increased  
387 plant defense.

388 By using DIA and Prosit, the number of proteins increased as well as the sensitivity of the  
389 detection. The number of proteins in low abundance were mostly predicted by Prosit. That's  
390 because the intensity prediction improved the quality of peptide identification by data searching  
391 [33]. The molecular weight of proteins from our study ranged from 8 kDa - 217 kDa,  
392 significantly broader than in previous studies. The smallest protein predicted by DIA+Prosit was  
393 BBE domain-containing protein (VIT\_10s0003g05430) with 8 kDa predicted only by  
394 DIA+Prosit with six exclusive peptides. This protein has been previously described as necessary  
395 in the plant-pathogen interaction of *Vitis* and *Botrytis cinerea*. BBE-like enzymes inactivate  
396 oligo galacturonides (OGs) accumulated as intermediate reaction products of the inhibition of  
397 polygalacturonases (PGs) by PG-inhibiting proteins (PGIPs) [42], [43]. By oxidizing OGs, those  
398 became less active as defense inducers and less susceptible to hydrolysis of the pathogen's PGs.  
399 The accumulation of OGs can compromise plant growth and resistance through cell death  
400 induction. Therefore, the downregulation of BBE-like enzymes in grapevines infected with *Xf*  
401 contribute to the plant's susceptibility. This is the first report of detection of this protein in grape  
402 xylem sap, only achieved with Prosit.

403 The largest protein was a member of the subtilase family (VIT\_16s0098g00970), with 217  
404 kDa detected by DIA and DIA+Prosit. These proteins control the establishment of systemic  
405 induced resistance and immune priming by the detection of the biotic stimulus [44]. This protein  
406 was not detected in Healthy plants in the DIA data, only in the Diseased plants with seven  
407 identified peptides. In the DIA+Prosit data, the number of peptides increased and were then  
408 detected in Healthy samples as well, but at lower levels compared to the Diseased. Prosit also  
409 increased the number of detected peptides to nine. This result exemplifies the increase in  
410 sensitivity by implementing Prosit to DIA data.

411

#### 412 **4.2. Plant response to *X. fastidiosa* infection as assessed by the vascular sap**

413 Although the number of studies investigating expressed transcripts and proteins in the  
414 xylem sap of plants infected with *Xf* is small, they have provided valuable information regarding  
415 plant responses to infection [23], [25], [41]. By accurately evaluating the vascular leaf sap of  
416 infected plants with *Xf* using a more sensitive and reproducible proteomic approach, our study  
417 confirmed the presence of secreted proteins associated with pathogenesis-related (PR) proteins,  
418 chitinases, and  $\beta$ -1-3-glucanases as the key players in mediating the defense response upon  
419 pathogen infection [25]. Our study specifically revealed  $\beta$ -1-3-glucanase 3  
420 (VIT\_08s0007g06060) as the vital protein contributing to the variance between Healthy and  
421 Diseased plants in the DIA+Prosit data (VIP = 3.1) and the second most important in the DIA  
422 data (VIP = 2.7). A total of five  $\beta$ -1-3-glucanases proteins were also detected in the DIA+Prosit,  
423 and only four were in the DIA data. Except for one protein (VIT\_06s0061g00100) that was  
424 slightly downregulated in the diseased plants, all the others in both data sets were upregulated.  $\beta$ -  
425 1-3-glucanases belong to the PR2 class, and their expression is induced by several pathogens  
426 including fungi, oomycetes and most recently shown to be induced by a bacterial infection [25],  
427 [41], [45], [46]. Other PR proteins (including PR1), proteases, chitinases, and peroxidases were  
428 also confirmed in our study but in a higher number of proteins. Chakraborty et al. (2016) were  
429 able to detect 15 peroxidases, and our DIA and DIA+Prosit increased this number to 20. This  
430 could be due to the Prosit predictions being generalized to non-tryptic peptides increasing  
431 peptide predictions [33].

432

#### 433 **5. Conclusions**



434 This study demonstrated a successful example of using the DIA approach combined with  
435 deep learning neural network Prosit for analysis of proteomic data. A total of 360 proteins were  
436 identified and quantified from the grapevines subjected to *Xf* inoculation. We also identified  
437 different sets of proteins regulated upon infection that were previously shown in other proteomic  
438 studies and highlighted new low molecular weight and low abundance proteins previously  
439 undetected. This is especially useful in samples with a lower protein abundance and diversity,  
440 providing more functional clues of significant players.

441

## 442 **6. Acknowledgments and Funding**

443 We thank Samuel Metcalf for sharing his expertise with the pressure chamber and Ken A.  
444 Shackel for allowing us to use his equipment. This work was supported by grants obtained from  
445 the California Department of Food and Agriculture Pierce's Disease Board (CDFA-PD Board).  
446 LC-MS was supported by a NIH shared instrumentation grant S10OD021801. C.H.D.S was  
447 supported by a Coordination for the Improvement of Higher Level Personnel grant (Coordenação  
448 de Aperfeiçoamento de Pessoal de Nível Superior Brazil, No. 99999.013202/2013-08).

449

## 450 **7. Author Contributions**

451 CHDS and AMD conceived and designed the experiments; CHDS coordinated and performed  
452 experiments, functional analysis and wrote of the manuscript edited by PAZ and AMD; RABA  
453 contributed in the data analysis and discussions; HS helped data analysis using MetaboAnlyst;  
454 MS helped with protein digestion and performed LC-MS/MS and chromatogram library creation;  
455 AJ helped plant material and inoculations, BSP conducted proteome data analysis, raw data  
456 processing and spectral library search; AMD and all others revised the final manuscript.

457

## 458 **8. Conflicts of Interest**

459 The authors declare no conflict of interest. The sponsors had no role in the design, execution,  
460 interpretation, or writing of the study

461

## 462 **9. References**

463 [1] V. De Schepper, T. De Swaef, I. Bauweraerts, and K. Steppe, "Phloem transport: A  
464 review of mechanisms and controls," *Journal of Experimental Botany*, vol. 64, no. 16. pp.  
465 4839–4850, 2013, doi: 10.1093/jxb/ert302.

- 466 [2] W. Tanner and H. Beevers, "Transpiration, a prerequisite for long-distance transport of  
467 minerals in plants?," *Proc. Natl. Acad. Sci. U. S. A.*, vol. 98, no. 16, pp. 9443–9447, 2001,  
468 doi: 10.1073/pnas.161279898.
- 469 [3] P. Carella, D. C. Wilson, C. J. Kempthorne, and R. K. Cameron, "Vascular Sap  
470 Proteomics: Providing Insight into Long-Distance Signaling during Stress," *Front. Plant  
471 Sci.*, vol. 7, no. MAY2016, p. 651, May 2016, doi: 10.3389/fpls.2016.00651.
- 472 [4] G. Drakakaki and A. Dandekar, "Protein secretion: How many secretory routes does a  
473 plant cell have?," *Plant Science*, vol. 203–204. pp. 74–78, Apr-2013, doi:  
474 10.1016/j.plantsci.2012.12.017.
- 475 [5] G. K. Agrawal, N. S. Jwa, M. H. Lebrun, D. Job, and R. Rakwal, "Plant secretome:  
476 Unlocking secrets of the secreted proteins," *Proteomics*, vol. 10, no. 4. pp. 799–827, Feb-  
477 2010, doi: 10.1002/pmic.200900514.
- 478 [6] K. A. Yadeta and B. P. H. J. Thomma, "The xylem as battleground for plant hosts and  
479 vascular wilt pathogens," *Frontiers in Plant Science*, vol. 4, no. APR. Frontiers Research  
480 Foundation, 23-Apr-2013, doi: 10.3389/fpls.2013.00097.
- 481 [7] M. J. Davis, A. H. Purcell, and S. V. Thomson, "Pierce's Disease of Grapevines: Isolation  
482 of the Causal Bacterium," *Science (80-. )*, vol. 199, no. 4324, pp. 75–77, 1978.
- 483 [8] V. Rossetti *et al.*, "Occurrence of xylem-restricted bacteria in sweet orange trees affected  
484 by chlorotic variegation, a new citrus disease in Brazil.," *Comptes Rendus l'Academie des  
485 Sci. Ser. 3, Sci. la Vie*, vol. 310, no. 8, pp. 345–349, 1990.
- 486 [9] G. P. Martelli, "The current status of the quick decline syndrome of olive in southern  
487 Italy," *Phytoparasitica*, vol. 44, no. 1, pp. 1–10, 2016, doi: 10.1007/s12600-015-0498-6.
- 488 [10] A. J. G. Simpson *et al.*, "The genome sequence of the plant pathogen *Xylella fastidiosa*,"  
489 *Nature*, vol. 406, pp. 151–157, 2000, doi: 10.1038/35018003.
- 490 [11] E. T. Thorne, J. F. Stevenson, T. L. Rost, J. M. Labavitch, and M. A. Matthews, "Pierce's  
491 disease symptoms: Comparison with symptoms of water deficit and the impact of water  
492 deficits," *Am. J. Enol. Vitic.*, vol. 57, no. 1, pp. 1–11, 2006.
- 493 [12] S. Chatterjee, C. Wistrom, and S. E. Lindow, "A cell-cell signaling sensor is required for  
494 virulence and insect transmission of [i]*Xylella fastidiosa*[i] .," *Proc. Natl. Acad. Sci. U. S.  
495 A.*, vol. 105, no. 7, pp. 2670–5, 2008, doi: 10.1073/pnas.0712236105.
- 496 [13] S. Chatterjee, R. P. Almeida, and S. Lindow, "Living in two worlds: the plant and insect  
497 lifestyles of *Xylella fastidiosa*," *Annu Rev Phytopathol*, vol. 46, pp. 243–271, 2008.
- 498 [14] M. Ionescu, C. Baccari, A. M. Da Silva, A. Garcia, K. Yokota, and S. E. Lindow,  
499 "Diffusible signal factor (DSF) synthase RpfF of *Xylella fastidiosa* is a multifunction  
500 protein also required for response to DSF," *J. Bacteriol.*, vol. 195, no. 23, pp. 5273–5284,  
501 Dec. 2013, doi: 10.1128/JB.00713-13.
- 502 [15] Q. Sun, Y. Sun, M. Andrew Walker, and J. M. Labavitch, "Vascular occlusions in  
503 grapevines with Pierce's disease make disease symptom development worse," *Plant  
504 Physiol.*, vol. 161, no. 3, pp. 1529–1541, Mar. 2013, doi: 10.1104/pp.112.208157.
- 505 [16] R. Nascimento *et al.*, "The Type II Secreted Lipase/Esterase LesA is a Key Virulence

- 506 Factor Required for *Xylella fastidiosa* Pathogenesis in Grapevines,” *Sci. Rep.*, vol. 6, no.  
507 1, pp. 1–17, Jan. 2016, doi: 10.1038/srep18598.
- 508 [17] O. R. Feitosa-Junior *et al.*, “Proteomic and Metabolomic Analyses of *Xylella fastidiosa*  
509 OMV-Enriched Fractions Reveal Association with Virulence Factors and Signaling  
510 Molecules of the DSF Family,” *Phytopathology*, vol. 109, no. 8, pp. 1344–1353, Aug.  
511 2019, doi: 10.1094/PHYTO-03-19-0083-R.
- 512 [18] H. Gouran *et al.*, “The Secreted Protease PrtA Controls Cell Growth, Biofilm Formation  
513 and Pathogenicity in *Xylella fastidiosa*,” *Sci. Rep.*, vol. 6, no. April, p. 31098, 2016, doi:  
514 10.1038/srep31098.
- 515 [19] N. P. Cianciotto and R. C. White, “Expanding Role of Type II Secretion in Bacterial  
516 Pathogenesis and Beyond,” 2017, doi: 10.1128/IAI.00014-17.
- 517 [20] A. da S. Santiago *et al.*, “The Antitoxin Protein of a Toxin-Antitoxin System from *Xylella*  
518 *fastidiosa* Is Secreted via Outer Membrane Vesicles,” *Front. Microbiol.*, vol. 7, no. DEC,  
519 p. 2030, Dec. 2016, doi: 10.3389/fmicb.2016.02030.
- 520 [21] C. B. Agüero, E. T. Thorne, A. M. Ibáñez, W. D. Gubler, and A. M. Dandekar, “Xylem  
521 sap proteins from *Vitis vinifera* L. Chardonnay,” *Am. J. Enol. Vitic.*, vol. 59, no. 3, pp.  
522 306–311, 2008.
- 523 [22] B. Delaunoy *et al.*, “Large-scale proteomic analysis of the grapevine leaf apoplastic fluid  
524 reveals mainly stress-related proteins and cell wall modifying enzymes,” *BMC Plant Biol.*,  
525 vol. 13, no. 1, pp. 1–15, Feb. 2013, doi: 10.1186/1471-2229-13-24.
- 526 [23] R. Katam, K. Chibanguza, L. M. Latinwo, and D. Smith, “Proteome Biomarkers in Xylem  
527 Reveal Pierce’s Disease Tolerance in Grape,” 2015, doi: 10.4172/jpb.1000372.
- 528 [24] L. Yang, H. Lin, Y. Takahashi, F. Chen, M. A. Walker, and E. L. Civerolo, “Proteomic  
529 analysis of grapevine stem in response to *Xylella fastidiosa* inoculation,” *Physiol. Mol.*  
530 *Plant Pathol.*, vol. 75, no. 3, pp. 90–99, Jan. 2011, doi: 10.1016/j.pmp.2010.11.002.
- 531 [25] S. Chakraborty *et al.*, “Sequence/structural analysis of xylem proteome emphasizes  
532 pathogenesis-related proteins, chitinases and  $\beta$ -1, 3-glucanases as key players in grapevine  
533 defense against *Xylella fastidiosa*,” *PeerJ*, vol. 2016, no. 5, p. e2007, May 2016, doi:  
534 10.7717/peerj.2007.
- 535 [26] S. Magdeldin *et al.*, “Basics and recent advances of two dimensional-polyacrylamide gel  
536 electrophoresis,” *Clin. Proteomics*, vol. 11, no. 1, pp. 1–10, 2014, doi: 10.1186/1559-  
537 0275-11-16.
- 538 [27] F. Zhang, W. Ge, G. Ruan, X. Cai, and T. Guo, “Data-Independent Acquisition Mass  
539 Spectrometry-based Proteomics and Software Tools: A Glimpse in 2020,” *Proteomics*,  
540 vol. 1900276, p. 1900276, 2020, doi: 10.1002/pmic.201900276.
- 541 [28] J. D. Venable, M. Q. Dong, J. Wohlschlegel, A. Dillin, and J. R. Yates, “Automated  
542 approach for quantitative analysis of complex peptide mixtures from tandem mass  
543 spectra,” *Nat. Methods*, vol. 1, no. 1, pp. 39–45, 2004, doi: 10.1038/nmeth705.
- 544 [29] D. Martins-de-Souza, V. M. Faça, and F. C. Gozzo, “DIA is not a new mass spectrometry  
545 acquisition method,” *Proteomics*, vol. 17, no. 7, Apr. 2017, doi: 10.1002/pmic.201700017.

- 546 [30] Y. Yang, X. Liu, C. Shen, Y. Lin, P. Yang, and L. Qiao, “In silico spectral libraries by  
547 deep learning facilitate data-independent acquisition proteomics,” *Nat. Commun.*, vol. 11,  
548 no. 1, 2020, doi: 10.1038/s41467-019-13866-z.
- 549 [31] B. C. Searle *et al.*, “Chromatogram libraries improve peptide detection and quantification  
550 by data independent acquisition mass spectrometry,” *Nature Communications*, vol. 9, no.  
551 1, 2018.
- 552 [32] B. C. Searle *et al.*, “Generating high quality libraries for DIA MS with empirically  
553 corrected peptide predictions,” *Nat. Commun.*, vol. 11, no. 1, 2020, doi: 10.1038/s41467-  
554 020-15346-1.
- 555 [33] S. Gessulat *et al.*, “Prosit: proteome-wide prediction of peptide tandem mass spectra by  
556 deep learning,” *Nat. Methods*, vol. 16, no. 6, pp. 509–518, Jun. 2019, doi:  
557 10.1038/s41592-019-0426-7.
- 558 [34] M. Francis, H. Lin, J. C. La Rosa, H. Doddapaneni, and E. L. Civerolo, “Genome-based  
559 PCR primers for specific and sensitive detection and quantification of *Xylella fastidiosa*,”  
560 *Eur. J. Plant Pathol.*, vol. 115, no. 2, pp. 203–213, 2006, doi: 10.1007/s10658-006-9009-  
561 4.
- 562 [35] M. C. Chambers *et al.*, “A cross-platform toolkit for mass spectrometry and proteomics,”  
563 *Nature Biotechnology*, vol. 30, no. 10. Nature Publishing Group, pp. 918–920, 10-Oct-  
564 2012, doi: 10.1038/nbt.2377.
- 565 [36] L. Käll, J. D. Canterbury, J. Weston, W. S. Noble, and M. J. MacCoss, “Semi-supervised  
566 learning for peptide identification from shotgun proteomics datasets,” *Nat. Methods*, vol.  
567 4, no. 11, pp. 923–925, Nov. 2007, doi: 10.1038/nmeth1113.
- 568 [37] L. Käll, J. D. Storey, M. J. MacCoss, and W. S. Noble, “Assigning significance to  
569 peptides identified by tandem mass spectrometry using decoy databases,” *Journal of*  
570 *Proteome Research*, vol. 7, no. 1. American Chemical Society, pp. 29–34, Jan-2008, doi:  
571 10.1021/pr700600n.
- 572 [38] L. Käll, J. D. Storey, and W. S. Noble, “Non-parametric estimation of posterior error  
573 probabilities associated with peptides identified by tandem mass spectrometry,” in  
574 *Bioinformatics*, 2008, vol. 24, no. 16, pp. 42–48, doi: 10.1093/bioinformatics/btn294.
- 575 [39] Y. Zhou *et al.*, “Metascape provides a biologist-oriented resource for the analysis of  
576 systems-level datasets,” *Nat. Commun.*, vol. 10, no. 1, 2019, doi: 10.1038/s41467-019-  
577 09234-6.
- 578 [40] J. Chong, D. S. Wishart, and J. Xia, “Using MetaboAnalyst 4.0 for Comprehensive and  
579 Integrative Metabolomics Data Analysis,” *Curr. Protoc. Bioinforma.*, vol. 68, no. 1, Dec.  
580 2019, doi: 10.1002/cpbi.86.
- 581 [41] S. M. Basha, H. Mazhar, and H. K. N. Vasanthaiah, “Proteomics approach to identify  
582 unique xylem sap proteins in pierce’s disease-tolerant vitis species,” *Appl. Biochem.*  
583 *Biotechnol.*, vol. 160, no. 3, pp. 932–944, Feb. 2010, doi: 10.1007/s12010-009-8620-1.
- 584 [42] R. M. Kalunke, S. Tundo, M. Benedetti, F. Cervone, G. De Lorenzo, and R. D’Ovidio,  
585 “An update on polygalacturonase-inhibiting protein (PGIP), aleucine-rich repeat protein

- 586 that protects crop plants against pathogens,” *Frontiers in Plant Science*, vol. 6, no. MAR.  
587 Frontiers Media S.A., p. 146, 20-Mar-2015, doi: 10.3389/fpls.2015.00146.
- 588 [43] M. C. Héloir *et al.*, “Recognition of Elicitors in Grapevine: From MAMP and DAMP  
589 Perception to Induced Resistance,” *Frontiers in Plant Science*, vol. 10. Frontiers Media  
590 S.A., p. 1117, 18-Sep-2019, doi: 10.3389/fpls.2019.01117.
- 591 [44] A. Figueiredo, F. Monteiro, and M. Sebastiana, “Subtilisin-like proteases in plant-  
592 pathogen recognition and immune priming: a perspective,” *Front. Plant Sci.*, vol. 5, no.  
593 DEC, p. 739, Dec. 2014, doi: 10.3389/fpls.2014.00739.
- 594 [45] C. Giannakis, C. S. Bucheli, K. G. M. Skene, S. P. Robinson, and N. Steele Scott,  
595 “Chitinase and  $\beta$ -1,3-glucanase in grapevine leaves: A possible defence against powdery  
596 mildew infection,” *Aust. J. Grape Wine Res.*, vol. 4, no. 1, pp. 14–22, 1998, doi:  
597 10.1111/j.1755-0238.1998.tb00130.x.
- 598 [46] P. Mestre *et al.*, “Identification of a *Vitis vinifera* endo- $\beta$ -1,3-glucanase with antimicrobial  
599 activity against *Plasmopara viticola*,” *Mol. Plant Pathol.*, vol. 18, no. 5, pp. 708–719, Jun.  
600 2017, doi: 10.1111/mpp.12431.
- 601

602 **10. Tables**

603

604

605 **Table 1.** Overview of Proteomics studies of vascular sap of grapevines.

606

| <i>Vitis sp.</i> variety              | Biological material       | <i>X. fastidiosa</i> inoculation | Method                        | Peptide spectra Analysis | Total proteins | Protein size (kDa) | Matched peptides | Signal peptide detection | Reference                |
|---------------------------------------|---------------------------|----------------------------------|-------------------------------|--------------------------|----------------|--------------------|------------------|--------------------------|--------------------------|
| Chardonnay                            | Xylem sap                 | No                               | 2D-PAGE<br>MALDI-TOF<br>MS/MS | GPM                      | 10             | 25-150             | 1                | No                       | Agüero et al., 2008      |
| PD tolerant and susceptible varieties | Xylem sap                 | No                               | 2D-PAGE<br>LC-MS/MS           | Mascot                   | ~100           | 20-75              | 1-4              | No                       | Bascha et al., 2010      |
| PD tolerant and susceptible varieties | Stem                      | Yes                              | 2D-PAGE<br>nano-LC-MS/MS      | Bioworks                 | ~200           | 14.4-45            | 2-32             | No                       | Yang et al., 2010        |
| Chardonnay                            | Leaf and Apoplastic fluid | No                               | 2D-PAGE<br>MALDI-TOF<br>MS/MS | Mascot                   | 227 and 89     | 15-120             | -                | No                       | Delaunois et al., 2013   |
| PD tolerant and susceptible varieties | Xylem tissue              | No                               | 2D-PAGE<br>MALDI-TOF<br>MS/MS | Mascot                   | ~200           | 20-75              | -                | No                       | Katam et al., 2015       |
| Thompson Seedless                     | Xylem sap                 | Yes                              | LC-MS/MS                      | Scaffold                 | 91             | 10-114             | 2-23             | Yes                      | Chakraborty et al., 2016 |
| Thompson Seedless                     | Vascular leaf sap         | Yes                              | LC-MS/MS                      | ScaffoldDIA              | 145            | 12-217             | 2-22             | Yes                      | <i>This study</i>        |
| Thompson Seedless                     | Vascular leaf sap         | Yes                              | LC-MS/MS                      | ScaffoldDIA<br>+ Prosit  | 360            | 8-217              | 2-31             | Yes                      | <i>This study</i>        |

607

608



609 **11. Figures**  
610

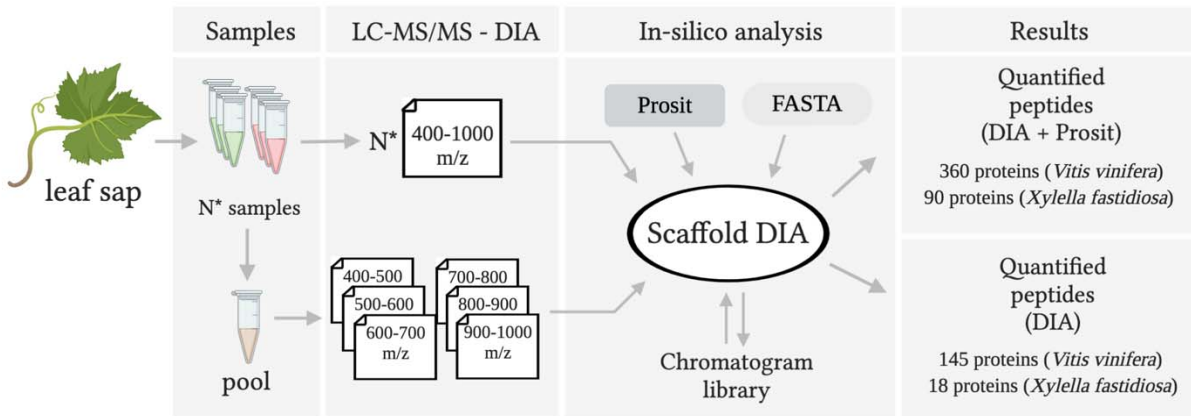

611  
612 **Figure 1.** Quantification of peptides with chromatogram libraries workflow. The chromatogram  
613 library generation was based on Searle et al. (2018). In summary, each quantitative replicate  
614 (analytic samples) for each group was measured by wide-window DIA experiment (400-1000  
615 m/z) besides the collection of several staggered narrow-window DIA experiment from the pooled  
616 sample of all samples. Afterwards, these narrow-window experiments have 2 m/z precursor  
617 isolation targeting every peptide between 400 and 1000 m/z. The peptides anchors were detected  
618 using ScaffoldDIA. Chromatographic data about each peptide was stored in a chromatogram  
619 library with retention times, peak shape, fragment ion intensities, and known interferences tuned  
620 specifically for the LC-MS/MS setting. ScaffoldDIA uses these precise coordinates for m/z,  
621 time, and intensity to detect peptides in the quantitative samples generating the DIA results box.  
622 Alternatively, in addition to the chromatogram library generated, a predicted library created  
623 using Prosit and FASTA information was added to determine quantified peptides and generated  
624 the DIA + Prosit results box. Created with BioRender.com.

625

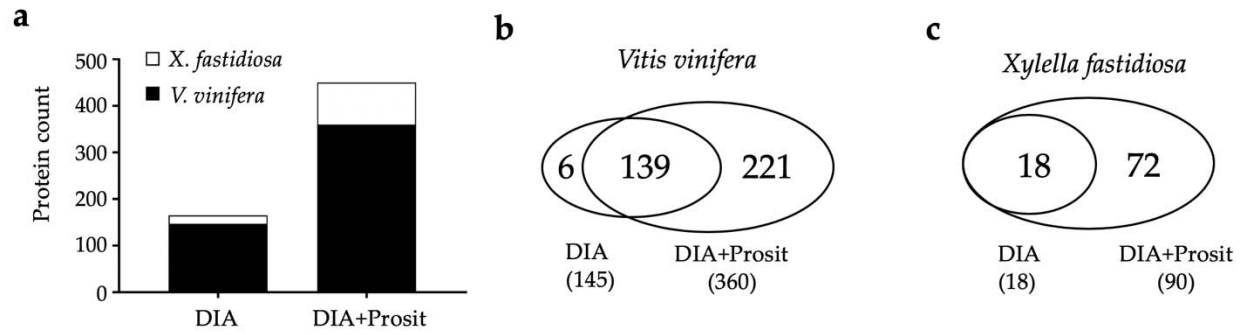

626

627

628 **Figure 2.** Proteomic analysis of *Vitis vinifera* and *Xylella fastidiosa*: a) total proteins identified

629 by data-independent acquisition (DIA) and DIA+Prosit; b) Venn diagram of the number of

630 proteins identified by each method for *V. vinifera*; and c) for *X. fastidiosa*.

631

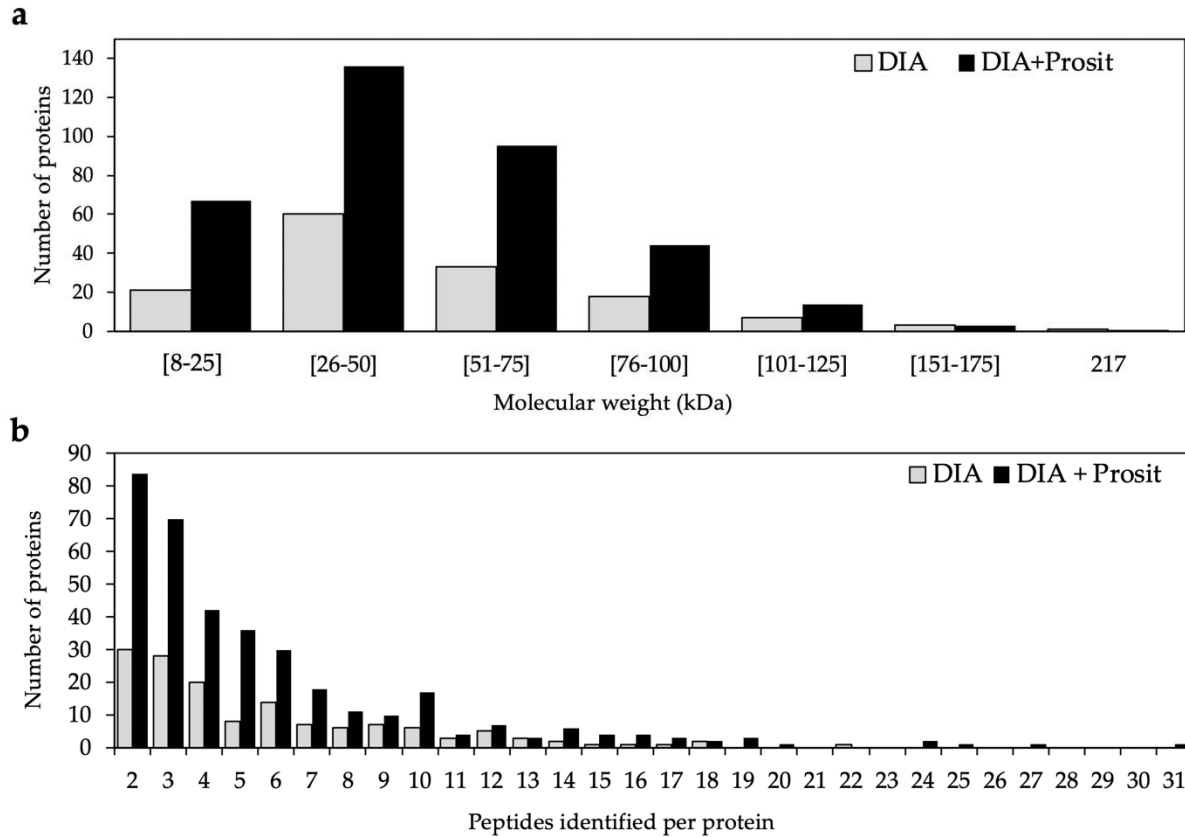

632

633 **Figure 3.** Distribution of the total number of proteins of *V. vinifera* identified by DIA and

634 DIA+Prosit by a) molecular weight (kDa) ranging from 8 to 217 kDa. b) Identified peptides

635 varying from 2 to 31 peptides per protein. Predicted proteins with only one peptide were

636 discarded.

637

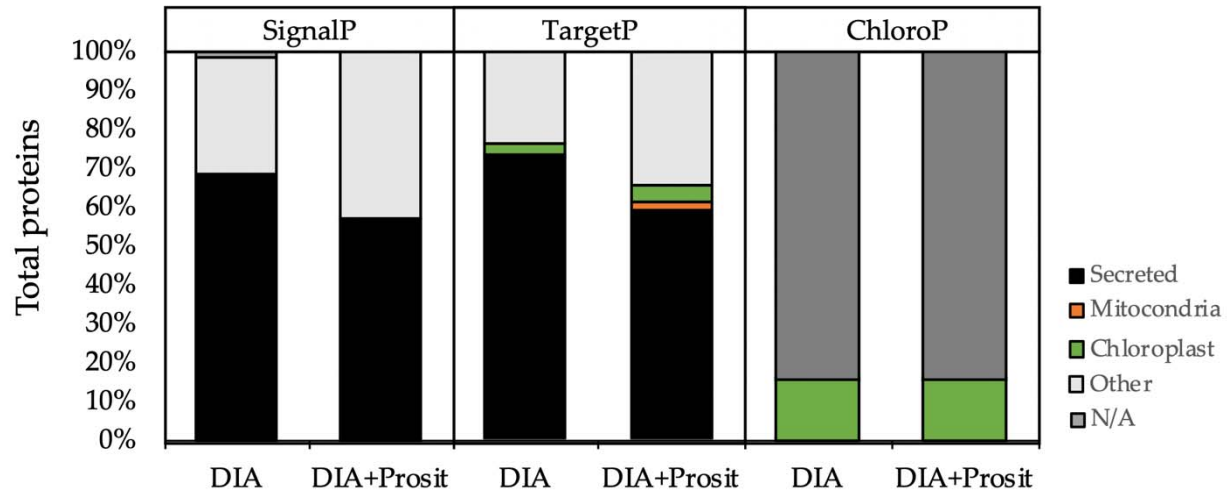

638

639 **Figure 4.** Subcellular localization prediction analysis and comparisons between DIA and  
640 DIA+Prosit data using SignalP, TargetP, and ChloroP servers. More than 50% of the total  
641 proteins identified were predicted having a signal peptide, according to SignalP and TargetP-SP.  
642 TargetP output revealed less than 3% of total proteins containing a mitochondrial targeting  
643 peptide (mTP) and less than 5% of proteins containing a chloroplast transit peptide (cTP).  
644 ChloroP predicted 16% of the collected vascular sap targeting the chloroplast by both methods.  
645 DIA considered a total of 145 proteins and DIA+Prosit, a total of 360 proteins for *V. vinifera*.

646

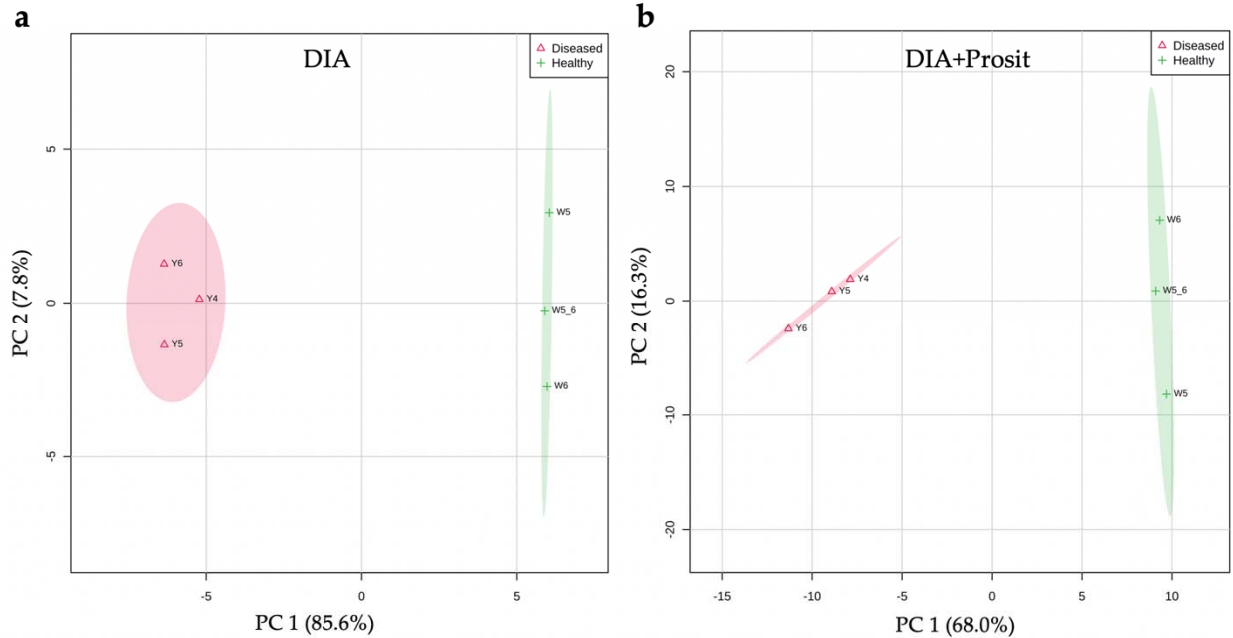

647

648 **Figure 5.** Principal Component Analysis (PCA) scores plots between PC1 and PC2 and  
649 explained variances are shown. The clear distinction between Diseased vs. Healthy proteomic  
650 data for *V. vinifera* at 12 weeks post-inoculation in both methods DIA and DIA+Prosit. W5\_6 is  
651 a virtual sample made of the average of data for plants W5 and W6 (Healthy plants), and Y4, Y5,  
652 and Y5 were individual Diseased plants.

653

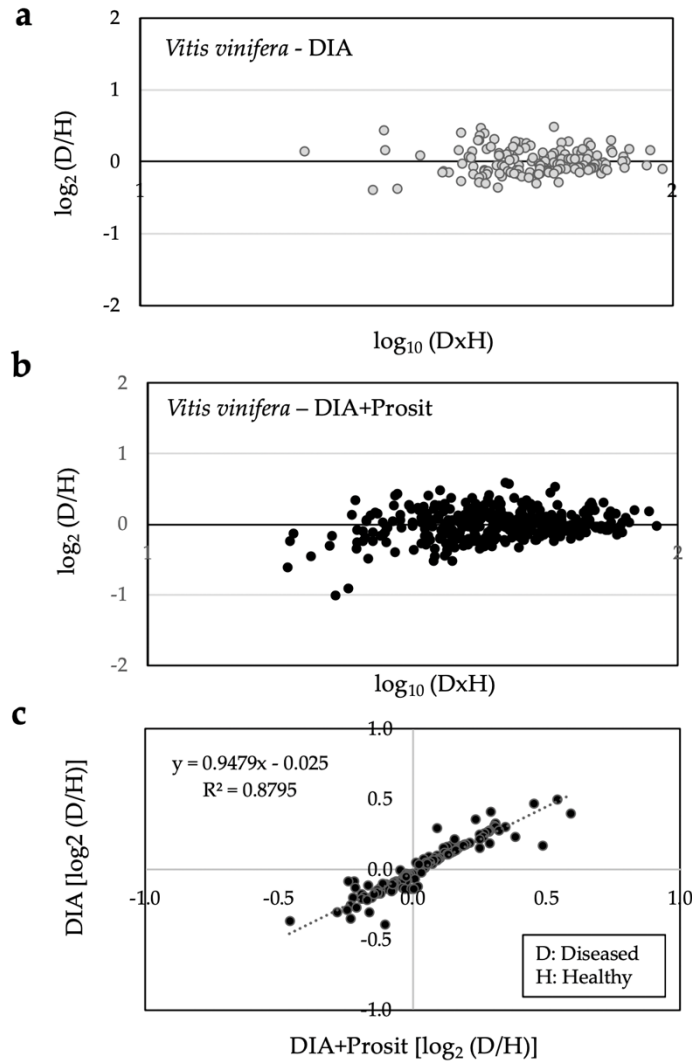

654

655

656 **Figure 6.** Overview of the plant response to *Xf* in Diseased samples in both data sets. Analysis of  
657 ratio-intensity plots displaying the  $\log_2$  D/H fold-change ratio of Diseased over Healthy plants  
658 for each protein as a function of the abundance by  $\log_{10}$  DxH product intensities: a) 145 proteins  
659 identified using DIA and b) 360 proteins identified by DIA+Prosit; c) Correlation between the  
660 ratios obtained from both analyses from the proteins detected in both analysis (139) with  $R^2 =$   
661 0.8795 show that the incorporation of Prosit maintained provided similar results but with higher  
662 quality and expanded the detection. D: Diseased and H: Healthy plants. The  $\log_{10}$  exclusive  
663 intensity data for each protein using an FDR>1% was used for both analyses.



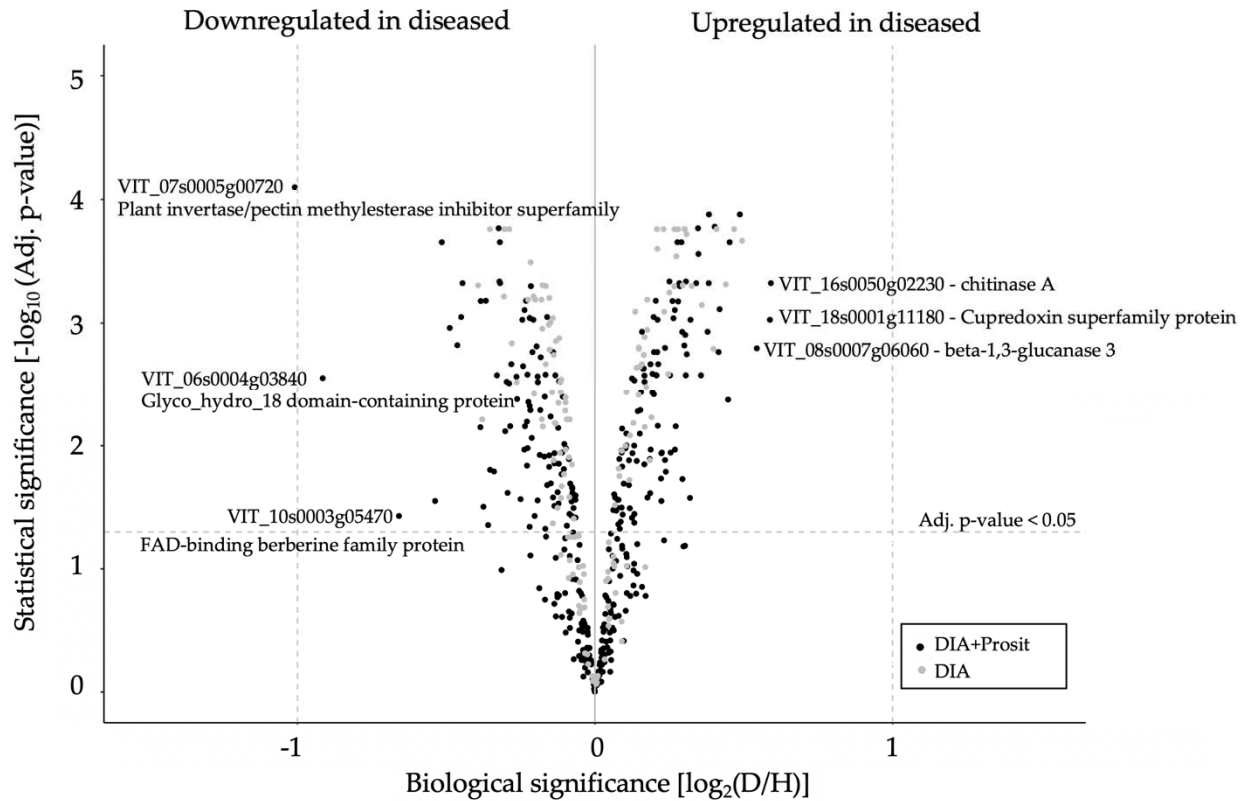

664  
665  
666  
667  
668  
669  
670  
671  
672

**Figure 7.** Proteome response of *V. vinifera* to *Xf* infection. Volcano plot analysis of Diseased (D) and Healthy (H) plants data identified by DIA and DIA+Prosit overlapped. Proteins identified by DIA are represented in grey dots and identified by DIA+Prosit in black dots. Adj. p-value calculated by Benjamin-Hochberg's false discovery rate greater than or equal to 0.05 were considered significant.

| DIA |   |   |                                                                    |
|-----|---|---|--------------------------------------------------------------------|
| VIP | H | D | Protein name                                                       |
| 5.2 | ■ | ■ | VIT_16s0098g00970 Subtilase family protein                         |
| 2.7 | ■ | ■ | VIT_08s0007g06060 Beta1,3-glucanase 3 (PR2)                        |
| 2.3 | ■ | ■ | VIT_14s0066g00620 Glyco_hydro_18 domain containing protein*        |
| 2.2 | ■ | ■ | VIT_03s0088g00810 Pathogenesis related gene 1 (PR1)                |
| 1.8 | ■ | ■ | VIT_03s0091g00160 Plant basic secretory protein BSP family protein |
| 1.8 | ■ | ■ | VIT_16s0050g02230 Chitinase A                                      |
| 1.8 | ■ | ■ | VIT_07s0005g03140 Eukaryotic aspartyl protease family protein      |
| 1.7 | ■ | ■ | VIT_04s0008g01150 Glycosyl hydrolases family 32 protein            |
| 1.6 | ■ | ■ | VIT_03s0088g00700 Cysteine rich secretory proteins (CAP)           |
| 1.6 | ■ | ■ | VIT_12s0059g02420 Peroxidase superfamily protein*                  |
| 1.6 | ■ | ■ | VIT_02s0025g04330 Osmotin 34                                       |
| 1.6 | ■ | ■ | VIT_04s0008g00120 Basic chitinase (PR3)                            |
| 1.5 | ■ | ■ | VIT_03s0063g02490 O-Glycosyl hydrolases family 17 protein          |
| 1.5 | ■ | ■ | VIT_13s0019g02490 Subtilase family protein*                        |
| 1.5 | ■ | ■ | VIT_08s0007g06040 Beta1,3-glucanase 3 (PR2)                        |
| 1.5 | ■ | ■ | VIT_02s0025g04250 Osmotin 34*                                      |
| 1.4 | ■ | ■ | VIT_10s0071g01130 Alpha-galactosidase 2                            |
| 1.4 | ■ | ■ | VIT_11s0206g00030 Glycosyl hydrolase family protein                |
| 1.4 | ■ | ■ | VIT_01s0127g00560 DC1 domain-containing protein                    |
| 1.4 | ■ | ■ | VIT_04s0008g01140 Beta-fructofuranosidase 5                        |
| 1.4 | ■ | ■ | VIT_14s0081g00030 Pathogenesis related 4 (PR4)                     |
| 1.4 | ■ | ■ | VIT_06s0061g00120 Beta1,3-glucanase 3 (PR2)                        |
| 1.3 | ■ | ■ | VIT_02s0025g02170 Trehalase 1*                                     |
| 1.3 | ■ | ■ | VIT_07s0005g06000 Uncharacterized prot. related to pathogenesis    |
| 1.2 | ■ | ■ | VIT_04s0008g07080 Eukaryotic aspartyl protease family protein      |

  

| DIA+Prosit |   |   |                                                                   |
|------------|---|---|-------------------------------------------------------------------|
| VIP        | H | D | Protein name                                                      |
| 3.1        | ■ | ■ | VIT_08s0007g06060 Beta-1,3-glucanase 3 (PR2)                      |
| 3.1        | ■ | ■ | VIT_16s0050g02230 Chitinase A                                     |
| 2.6        | ■ | ■ | VIT_03s0088g00700 Cysteine-rich secretory protein (CAP)           |
| 2.6        | ■ | ■ | VIT_03s0088g00810 Pathogenesis-related gene 1 (PR1)               |
| 2.2        | ■ | ■ | VIT_00s0357g00080 Cellulase glycosyl hydrolase family 5 protein*  |
| 2.1        | ■ | ■ | VIT_10s0071g01130 Alpha-galactosidase 2                           |
| 2.0        | ■ | ■ | VIT_04s0008g00140 Chitin-binding type-1 domain-containing prot.*  |
| 2.0        | ■ | ■ | VIT_04s0008g00120 Basic chitinase                                 |
| 2.0        | ■ | ■ | VIT_03s0091g00160 Plant basic secretory protein BSP family prot.* |
| 1.8        | ■ | ■ | VIT_04s0008g01140 Beta-fructofuranosidase 5                       |
| 1.8        | ■ | ■ | VIT_02s0025g04330 Osmotin 34                                      |
| 1.7        | ■ | ■ | VIT_01s0127g00560 DC1 domain-containing protein                   |
| 1.7        | ■ | ■ | VIT_03s0063g02490 O-Glycosyl hydrolases family 17 protein         |
| 1.7        | ■ | ■ | VIT_06s0061g00120 Beta-1,3-glucanase 3 (PR2)                      |
| 1.6        | ■ | ■ | VIT_08s0007g06040 Beta-1,3-glucanase 3 (PR2)                      |
| 1.6        | ■ | ■ | VIT_14s0081g00030 Pathogenesis-related 4 (PR4)                    |
| 1.5        | ■ | ■ | VIT_07s0005g03140 Eukaryotic aspartyl protease family protein*    |
| 1.5        | ■ | ■ | VIT_07s0005g06000 Uncharacterized prot. related to pathogenesis   |
| 1.4        | ■ | ■ | VIT_12s0028g00610 Eukaryotic aspartyl protease family protein     |
| 1.4        | ■ | ■ | VIT_11s0206g00030 Glycosyl hydrolase family protein               |
| 1.4        | ■ | ■ | VIT_04s0008g07080 Eukaryotic aspartyl protease family protein     |
| 1.4        | ■ | ■ | VIT_03s0063g00400 Alpha-amylase-like*                             |
| 1.3        | ■ | ■ | VIT_04s0008g01150 Glycosyl hydrolases family 32 protein*          |
| 1.3        | ■ | ■ | VIT_02s0025g04270 Osmotin 34                                      |
| 1.3        | ■ | ■ | VIT_16s0098g00970 Subtilase family protein                        |

673  
674  
675  
676  
677  
678  
679  
680  
681

**Figure 8.** Top 25 proteins of *V. vinifera* contributing to the variance between the groups observed by PLS-DA. The plot shows the variable importance in projection (VIP) scores, and the colored boxes indicate the relative intensity detected by DIA and DIA+Prosit of the corresponding protein in Diseased and Healthy plants. Red represents high and green, low exclusive intensity detected. Proteins marked with (\*) are exclusive among the top 25 of the respective method.

**a** DIA - Upregulated

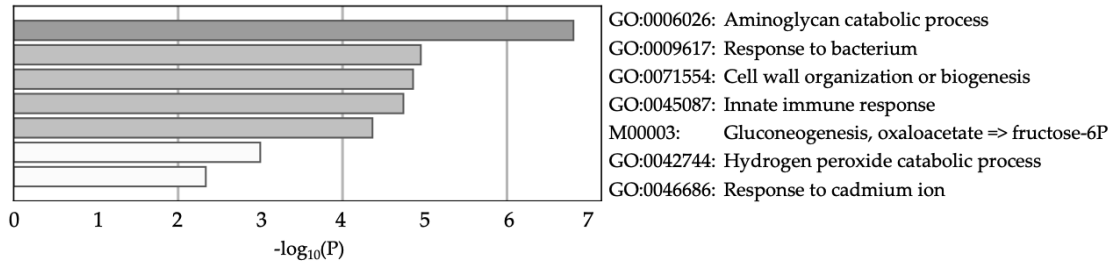

**b** DIA+Prosit - Upregulated

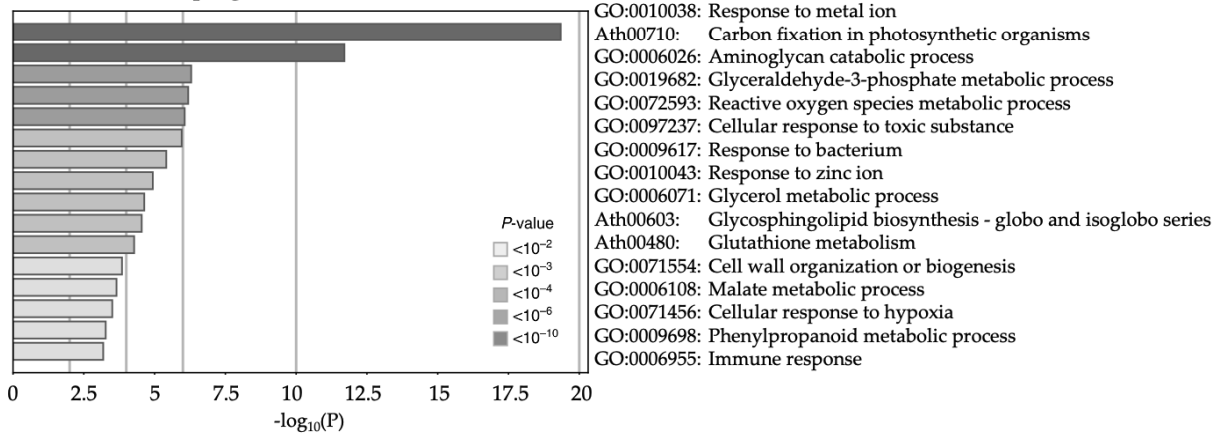

682  
683  
684  
685  
686  
687  
688  
689

**Figure 9.** Upregulated pathways during *Xf* infection in *V. vinifera*. Non-redundant enriched ontology clusters of significantly expressed proteins upregulated during *Xf* infection ( $p < 0.05$ ) in a) DIA and b) DIA+Prosit data sets. DIA+Prosit allows the identification of a higher number of pathways likely involved with plant response to bacteria.

**a** DIA - Downregulated

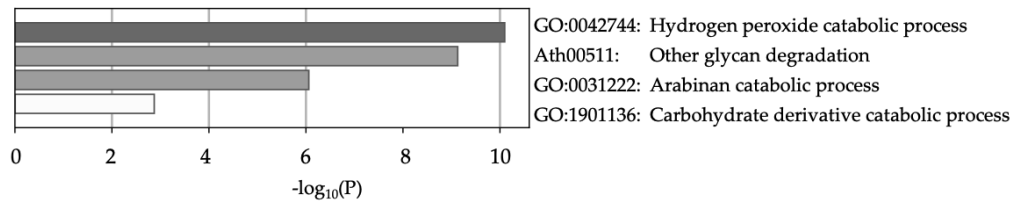

**b** DIA+Prosit - Downregulated

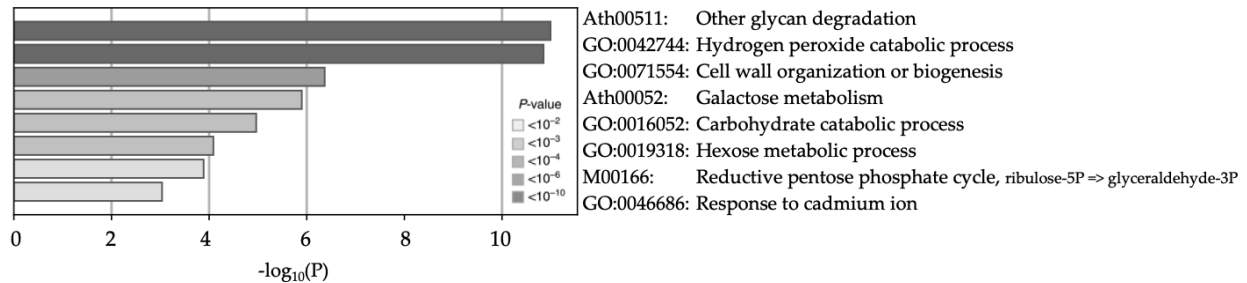

690

691

692 **Figure 10.** Downregulated pathways during *Xf* infection in *V. vinifera*. Non-redundant enriched

693 ontology clusters of significantly expressed proteins downregulated during *Xf* infection ( $p < 0.05$ )

694 in a) DIA and b) DIA+Prosit data sets. Similarly to Fig.8, DIA+Prosit allowed the identification

695 of a higher number of pathways likely involved with plant response to infection.

696

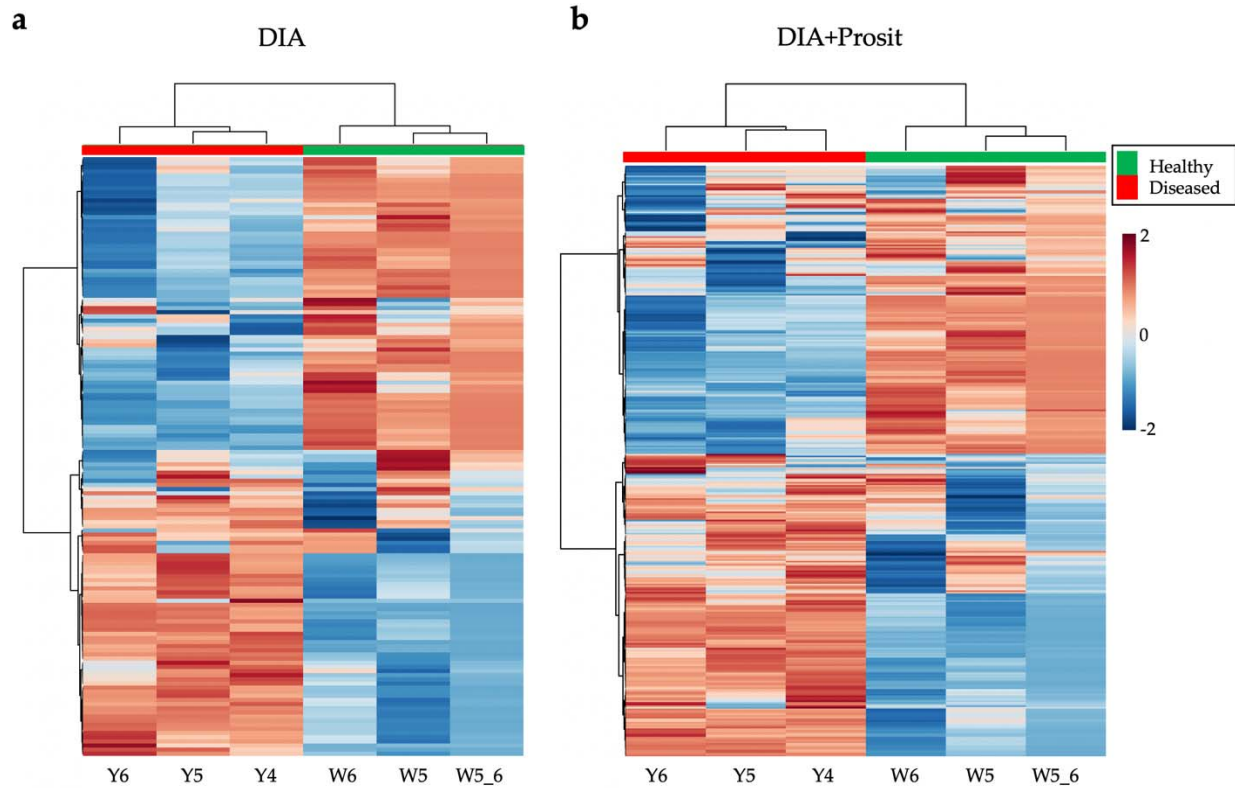

697  
698  
699  
700  
701  
702  
703  
704

**Figure S1.** Heat map visualization of the effects of *X. fastidiosa* in grapevines through proteomic analysis of vascular sap of leaves. Hierarchical clustering using Euclidean distance and Ward's linkage for the clustering algorithm. Samples Y4, Y5, Y6 from Diseased plants and W5 and W6 from Healthy plants. Sample W5\_6 is a virtual sample made from the average of W5 and W6. Log<sub>10</sub> of the exclusive intensity was used from a) DIA and b) DIA+Prosit data sets.

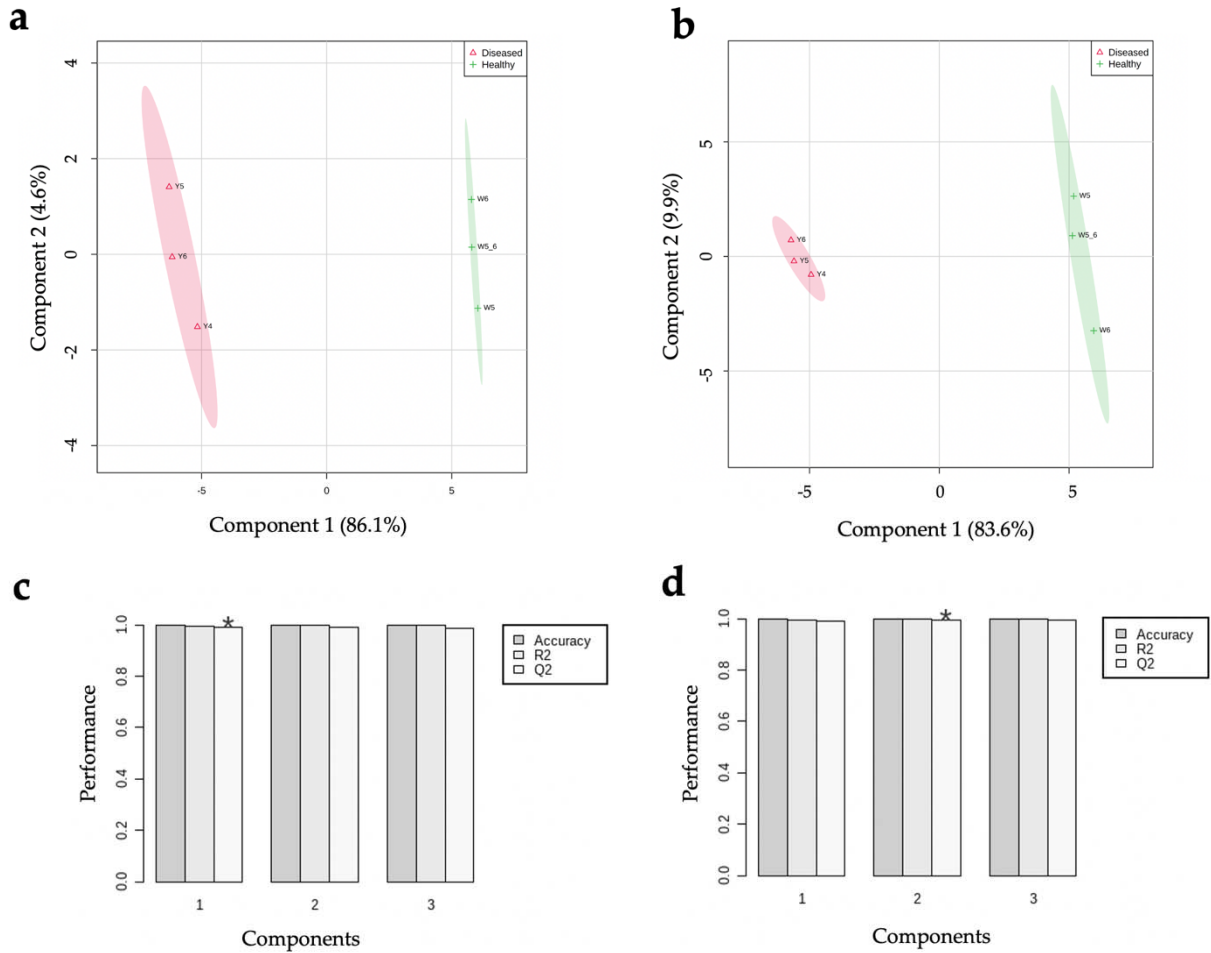

705  
706  
707  
708  
709  
710  
711  
712

**Figure S2.** PLS-DA plots and cross-validation of *V. vinifera* samples of Diseased and Healthy plants using a) for DIA data and b) for DIA+Prosit data set. Validation of both models shown by R2 (the sum of squares captured by the model) and Q2 (cross-validation of R2) for the first three components for c) DIA and d) DIA+Prosit. By using Q2, the star indicates the best number of components for the model.
